# Supplementary material for: Impact of Climate Change on Physicochemical Properties and Nutritional Quality of Bread Wheat Triticum aestivum
Source: Research Square preprint supplement (doi:10.21203/rs.3.rs-8778078/v1), 2026-02-13
Supplement: Supplementary file 1 [file 2555323fdd8227425b2a3372.docx]

**Supportive Materials for The Impact of Climate Change on Physiochemical Properties and Nutritional Aspects of Bread Wheat (Triticum aestivum): A Review**

**Table 1. Summary of FACE (Free-Air CO₂ Enrichment) Studies and Their Impact on Wheat Protein and Mineral Content**

| No | Study | CO₂ Level (ppm) | Wheat Variety | Location | Key Findings on Protein | Key Findings on Minerals | Notes |
| --- | --- | --- | --- | --- | --- | --- | --- |
| 1 | Högy & Fangmeier (2008) | 550 | cv. Batis | Germany | ↓ 7–15% protein | ↓ Fe (4–10%), ↓ Zn (6–13%) | Decline due to N-dilution effect |
| 2 | Myers et al. (2014) | 546 ± 47 | Multiple | Multi-country | ↓ 6.3% protein | ↓ Fe (4%), ↓ Zn (9%), ↓ Mg | Meta-analysis of 7 FACE sites |
| 3 | Fernando et al. (2012) | 570 | cv. Yitpi | Australia | ↓ ~10% protein | ↓ Zn, ↓ Fe, ↓ S | Protein dilution consistent with yield gain |
| 4 | Uddin et al. (2021) | 600 | cv. Baj | Pakistan | ↓ 9.1% protein | ↓ Zn, ↓ Fe, ↓ Ca | Strong genotype × CO₂ interaction |
| 5 | Broberg et al. (2017) | 550–575 | Various | Meta-analysis | ↓ 7% protein | ↓ Zn (3–12%), ↓ Fe (2–9%) | Crop quality compromised despite yield gains |
| 6 | Zhao et al. (2018) | 550 | Multiple | China | ↓ Protein content | ↓ Zn (5.1%), ↓ Fe (4.2%) | Long-term FACE trials showed consistent trends |
| 7 | Fitzgerald et al. (2016) | 550 | cv. Janz | Australia | ↓ 5–8% protein | ↓ Zn, ↓ Fe | Reduction varied across growth stages |
| 8 | Bourgault et al. (2020) | 600 | cv. Mace | Australia | ↓ 10% protein | ↓ Micronutrient density | Interaction with nitrogen fertilization observed |
| 9 | Zhang et al. (2022) | 550 | Multiple | China | ↓ Total N/protein | ↓ Ca, ↓ Mg, ↓ Zn | Varied responses by cultivar |

### **Key Trends Identified**

**Protein concentration** generally decreases under elevated CO₂ (~5–15%), even if absolute yield increases.

**Micronutrients** such as **Fe, Zn, Mg, and Ca** decline consistently, posing nutritional risks.

The extent of decline varies by **genotype**, **location**, and **nitrogen availability**.

This is largely due to the **carbohydrate dilution effect** and reduced transpiration limiting mass flow of minerals.

**Table 2**: Database of 70 reviewed articles with metadata including climate stress factors, wheat genotype, experimental conditions, and quality metrics.

| **No** | **Field** | **Description** | **Data Type** | **Examples / Notes** |
| --- | --- | --- | --- | --- |
| **1** | **Study ID** | Unique ID for each article | Alphanumeric | e.g., S01, S02…S70 |
| **2** | **Author(s)** | First author + et al. | Text | e.g., “Myers et al.” |
| **3** | **Publication Year** | Year of publication | Numeric | 2010–2024 |
| **4** | **Journal** | Publication source | Text | e.g., Global Change Biology, Field Crops Research |
| **5** | **Country / Region** | Location of study | Text | e.g., Australia, China, Ethiopia |
| **6** | **Climate Stress Factor(s)** | Main environmental variables tested | Categorical | eCO₂, Heat, Drought, eCO₂+Heat, eCO₂+Drought |
| **7** | **Experimental Type** | Field, FACE, Growth chamber, Greenhouse | Categorical | FACE preferred for realism |
| **8** | **CO₂ Concentration (ppm)** | CO₂ levels used in elevated treatments | Numeric | 500–700 ppm |
| **9** | **Temperature Stress (°C)** | Degree and duration of heat exposure | Numeric | e.g., +4°C for 10 days |
| **10** | **Water Availability** | Irrigated, Rainfed, Drought-simulated | Categorical | Drought intensity/duration also noted |
| **11** | **Genotype / Cultivar** | Name(s) of wheat varieties used | Text | e.g., Janz, Yitpi, Mace, Pavon 76 |
| **12** | **Growth Stage Exposed** | Stage when stress applied | Categorical | Anthesis, Grain filling, Whole season |
| **13** | **Grain Yield (t/ha)** | Reported yield under control vs. stress | Numeric | Mean and SD |
| **14** | **Protein Content (%)** | Grain protein % dry weight | Numeric | Includes changes (↑/↓) |
| **15** | **Gluten Quality** | Functional gluten metrics | Text/Numeric | SDS sedimentation, dough strength |
| **16** | **Micronutrients** | Zn, Fe, Ca, Mg, P content | Numeric | mg/kg or ppm; includes direction of change |
| **17** | **Phytate Levels** | If reported | Numeric/Text | % or mg/g; linked to bioavailability |
| **19** | **Statistical Significance** | Whether changes were statistically significant | Boolean | Yes / No |
| **20** | **G×E Interaction Reported** | Genotype × Environment noted? | Boolean | Yes / No |
| **21** | **Main Conclusions** | Key summary of findings | Text | e.g., “eCO₂ reduced Zn, Fe despite yield gain” |
