# Supplementary material for: Impact of Climate Change on Physicochemical Properties and Nutritional Quality of Bread Wheat Triticum aestivum
Source: Research Square preprint supplement (doi:10.21203/rs.3.rs-8778078/v1), 2026-02-13

**Supportive Materials for The Impact of Climate Change on Physiochemical Properties and Nutritional Aspects of Bread Wheat (Triticum aestivum): A Review**

**Figure 1**: Diagram showing the mechanism of starch and protein synthesis disruption under heat and drought stress.


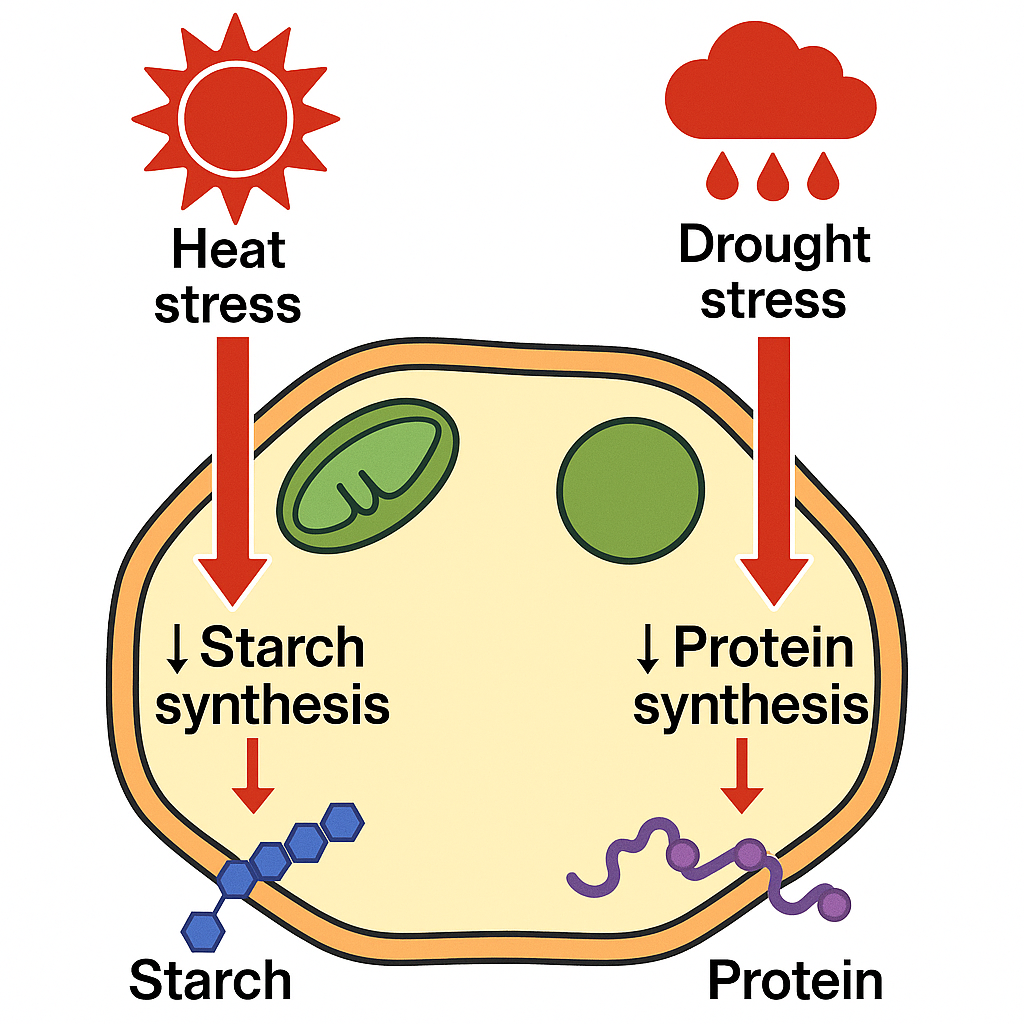

Supplement: Supplementary file 2 [file be735c26ca9e384a701c845c.docx]
